# Supplementary material
Source: PubMed Central journal article supplement (PMC2323656)
Supplement: ppat.0040032.st001.pdf [file ppat.0040032.st001.pdf]

**Table S1.** Relative occurrences of four types of nodes in each of the three networks: Whole human PPI network (W), the human PPI network yielded by High-Throughput experiments (HT), and the human PPI network consisting only of Manually Curated PPIs (MC). The “Fraction” column defines the cutoff at which a protein is considered a hub or a bottleneck. The other columns represent the fraction of hub-bottleneck, non-hub-bottleneck, hub-non-bottleneck, and non-hub-non-bottleneck proteins in the network using that cutoff.

| Network | Fraction | Hub-Bottleneck | Non-Hub-Bottleneck | Hub-Non-Bottleneck | Non-Hub-Non-Bottleneck |
|---------|----------|----------------|--------------------|--------------------|------------------------|
| W       | 0.10     | 0.001          | 0.039              | 0.000              | 0.960                  |
|         | 0.20     | 0.003          | 0.078              | 0.001              | 0.918                  |
|         | 0.30     | 0.007          | 0.115              | 0.002              | 0.876                  |
|         | 0.40     | 0.012          | 0.155              | 0.010              | 0.824                  |
| HT      | 0.10     | 0.002          | 0.033              | 0.000              | 0.965                  |
|         | 0.20     | 0.004          | 0.066              | 0.000              | 0.930                  |
|         | 0.30     | 0.006          | 0.100              | 0.000              | 0.894                  |
|         | 0.40     | 0.009          | 0.132              | 0.000              | 0.859                  |
| MC      | 0.10     | 0.001          | 0.043              | 0.001              | 0.955                  |
|         | 0.20     | 0.003          | 0.086              | 0.002              | 0.909                  |
|         | 0.30     | 0.008          | 0.127              | 0.007              | 0.858                  |
|         | 0.40     | 0.012          | 0.173              | 0.021              | 0.794                  |
