# Supplementary material
Source: PubMed Central journal article supplement (PMC2323656)
Supplement: ppat.0040032.st002.pdf [file ppat.0040032.st002.pdf]

**Table S2.** Summary of GSEA results with and without human-HIV inter-actions for three networks: Whole human PPI network (W), the human PPI network yielded by High-Throughput experiments (HT), and the human PPI network consisting only of Manually Curated PPIs (MC). We report  $p$ -values only for the sets of human proteins in Figure 3. The “#proteins in group” column displays the total number of human proteins in that group. The “ES ” column displays the enrichment score calculated by GSEA. The column titled “#proteins contributing” displays the number of proteins contributing to the ES score (see Methods for details.) The column titled “Jaccard’s” lists the Jaccard coefficient between the two sets of proteins contributing to the ES score for degree and for centrality.

| All Human-Pathogen PPIs |             |                    |      |                        |                      |      |                        |                      |           |
|-------------------------|-------------|--------------------|------|------------------------|----------------------|------|------------------------|----------------------|-----------|
| Network                 | Protein Set | #proteins in group | ES   | Degree                 |                      | ES   | Centrality             |                      | Jaccard's |
|                         |             |                    |      | #proteins contributing | p-value              |      | #proteins contributing | p-value              |           |
| W                       | Virus       | 1,029              | 0.79 | 563                    | $< 1 \times 10^{-6}$ | 0.83 | 349                    | $< 1 \times 10^{-6}$ | 0.51      |
|                         | Multivirus  | 182                | 0.84 | 129                    | $< 1 \times 10^{-6}$ | 0.86 | 80                     | $1.2 \times 10^{-4}$ | 0.60      |
|                         | Bacteria    | 108                | 0.76 | 65                     | $3 \times 10^{-5}$   | 0.89 | 31                     | $2.3 \times 10^{-4}$ | 0.45      |
| HT                      | Virus       | 466                | 0.68 | 156                    | $< 1 \times 10^{-6}$ | 0.83 | 108                    | $1.5 \times 10^{-3}$ | 0.53      |
|                         | Multivirus  | 98                 | 0.65 | 36                     | 0.03                 | 0.86 | 31                     | 0.1                  | 0.68      |
|                         | Bacteria    | 43                 | 0.79 | 13                     | $2 \times 10^{-3}$   | 0.89 | 12                     | 0.02                 | 0.66      |
| MC                      | Virus       | 958                | 0.78 | 523                    | $< 1 \times 10^{-6}$ | 0.83 | 308                    | $< 1 \times 10^{-6}$ | 0.47      |
|                         | Multivirus  | 174                | 0.83 | 119                    | $< 1 \times 10^{-6}$ | 0.86 | 85                     | $1.9 \times 10^{-5}$ | 0.63      |
|                         | Bacteria    | 100                | 0.73 | 66                     | $3.4 \times 10^{-4}$ | 0.89 | 37                     | $9.2 \times 10^{-4}$ | 0.51      |
| Without Human-HIV PPIs  |             |                    |      |                        |                      |      |                        |                      |           |
| W                       | Virus       | 499                | 0.80 | 263                    | $< 1 \times 10^{-6}$ | 0.85 | 195                    | $< 1 \times 10^{-6}$ | 0.59      |
|                         | Multivirus  | 81                 | 0.83 | 60                     | $< 1 \times 10^{-6}$ | 0.86 | 43                     | $3.6 \times 10^{-3}$ | 0.66      |
| HT                      | Virus       | 267                | 0.70 | 93                     | $1 \times 10^{-6}$   | 0.84 | 66                     | $6.1 \times 10^{-6}$ | 0.57      |
|                         | Multivirus  | 46                 | 0.72 | 21                     | 0.02                 | 0.86 | 18                     | 0.07                 | 0.70      |
| MC                      | Virus       | 958                | 0.78 | 523                    | $< 1 \times 10^{-6}$ | 0.80 | 308                    | $< 1 \times 10^{-6}$ | 0.47      |
|                         | Multivirus  | 174                | 0.83 | 119                    | $< 1 \times 10^{-6}$ | 0.85 | 85                     | $1.3 \times 10^{-3}$ | 0.63      |
